# Supplementary material for: A Well-Overflow Prediction Algorithm Based on Semi-Supervised Learning
Source: MDPI journal article supplement (doi:10.3390/en15124324), 2022-06-13
Supplement: s1 [file s1]

# A Well-Overflow Prediction Algorithm Based on Semi-Supervised Learning

Wei Liu <sup>1</sup>, Jiasheng Fu <sup>1</sup>, Yanchun Liang <sup>2,3</sup>, Mengchen Cao <sup>2</sup> and Xiaosong Han <sup>2,\*</sup>

<sup>1</sup> CNPC Engineering Technology R&D Company Limited, Beijing 102206, China; liuweidri@cnpc.com.cn (W.L.); fujsdr@cnpc.com.cn (J.F.)

<sup>2</sup> Key Laboratory for Symbol Computation and Knowledge Engineering of National Education Ministry, College of Computer Science and Technology, Jilin University, Changchun 130012, China; ycliang@jlu.edu.cn (Y.L.); caomc21@mails.jlu.edu.cn (M.C.)

<sup>3</sup> Zhuhai Laboratory of Key Laboratory for Symbol Computation and Knowledge Engineering of Ministry of Education, Zhuhai College of Science and Technology, Zhuhai 519041, China

\* Correspondence: hanxiaosong@jlu.edu.cn

The detailed network framework is shown as follows.

**Table S1.** Detailed Network Framework.

| No | Layer Type  | Output Dimension | Activation Function | Related Parameter                   |
|----|-------------|------------------|---------------------|-------------------------------------|
| 1  | Conv1d      | (490, 64)        | ReLu                | kernel_size=11,out_channelss=64     |
| 2  | BatchNorm1d | (490, 64)        | -                   | momentum=0.5                        |
| 3  | MaxPool1d   | (245, 64)        | -                   | kernel_size=2                       |
| 4  | Conv1d      | (239, 128)       | ReLu                | kernel_size=7,out_channels=128      |
| 5  | BatchNorm1d | (239, 128)       | -                   | momentum=0.5                        |
| 6  | MaxPool1d   | (119, 128)       | -                   | kernel_size=2                       |
| 7  | Conv1d      | (115, 128)       | ReLu                | kernel_size=10,<br>out_channels=128 |
| 8  | BatchNorm1d | (115, 128)       | -                   | momentum=0.5                        |
| 9  | MaxPool1d   | (55, 128)        | -                   | kernel_size=2                       |
| 10 | LSTM        | (55, 50)         | -                   | hidden_size=50,<br>num_layers=1     |
| 11 | Flatten     | (55 × 50, )      | -                   | -                                   |
| 12 | Dropout     | (55 × 50, )      | -                   | 0.5                                 |
| 13 | Linear      | (500, )          | ReLu                | Linear (55 * 50, 500)               |
| 14 | Dropout     | (500, )          | -                   | 0.5                                 |
| 15 | Linear      | (250, )          | ReLu                | Linear (500,250)                    |
| 16 | Linear      | (2,1)            | -                   | Linear (250,2)                      |
